# Supplementary material for: Gene Expression Analysis Reveals Prognostic Biomarkers of the Tyrosine Metabolism Reprogramming Pathway for Prostate Cancer
Source: Hindawi journal article supplement (doi:10.1155/2022/5504173), 2022-07-06
Supplement: f1 [file 5504173.f1.zip]

**Supplemental Table 2. Significant Hallmark gene set enrichment analysis results between S1 and S2.**

| ID                        | SetSize | EnrichmentScore | NES       | P-value  | P-adjust | Q-values | rank  |
|---------------------------|---------|-----------------|-----------|----------|----------|----------|-------|
| G2M_CHECKPOINT            | 189     | -0.524814       | -2.017626 | 0.001049 | 0.010028 | 0.006122 | 3584  |
| MYC_TARGETS_V1            | 194     | -0.452682       | -1.741185 | 0.001052 | 0.010028 | 0.006122 | 13717 |
| OXIDATIVE_PHOSPHORYLATION | 184     | -0.468859       | -1.796860 | 0.001053 | 0.010028 | 0.006122 | 10413 |
| E2F_TARGETS               | 195     | -0.578985       | -2.226787 | 0.001054 | 0.010028 | 0.006122 | 6864  |
| DNA_REPAIR                | 147     | -0.466477       | -1.750368 | 0.001068 | 0.010028 | 0.006122 | 8748  |
| MYC_TARGETS_V2            | 58      | -0.528812       | -1.788342 | 0.001203 | 0.010028 | 0.006122 | 11673 |
