# Supplementary material for: Gene Expression Analysis Reveals Prognostic Biomarkers of the Tyrosine Metabolism Reprogramming Pathway for Prostate Cancer
Source: Hindawi journal article supplement (doi:10.1155/2022/5504173), 2022-07-06
Supplement: f1 [file 5504173.f1.zip]

**supplemental Table 1. Top100 Differentially expressed genes between S1 and**

| <b>Gene_symbol</b> | <b>BaseMean</b> | <b>Log2FoldChange</b> | <b>LfcSE</b> | <b>Stat</b>  |
|--------------------|-----------------|-----------------------|--------------|--------------|
| TSPAN6             | 3408.461655     | 0.029438623           | 0.051573841  | 0.570805328  |
| TNMD               | 12.77626702     | 0.177506155           | 0.213832327  | 0.830118427  |
| DPM1               | 1379.971508     | -0.067329167          | 0.028090227  | -2.396889425 |
| SCYL3              | 1003.670781     | 0.123456864           | 0.043750402  | 2.821845231  |
| C1orf112           | 204.8614888     | -0.105589668          | 0.044517769  | -2.371854408 |
| FGR                | 269.0020519     | 0.168763694           | 0.082530176  | 2.044872578  |
| CFH                | 1127.365461     | 0.330783294           | 0.099643777  | 3.31965833   |
| FUCA2              | 3452.154        | -0.077983974          | 0.04574866   | -1.704617682 |
| GCLC               | 2595.098894     | 0.134625827           | 0.049977261  | 2.69374162   |
| NFYA               | 1904.498181     | -0.072626101          | 0.045305169  | -1.60304229  |
| STPG1              | 670.375862      | -0.036391928          | 0.04544593   | -0.800774201 |
| NIPAL3             | 7636.92732      | 0.401916667           | 0.099358578  | 4.045112918  |
| LAS1L              | 2631.438153     | -0.339158665          | 0.030652791  | -11.06452794 |
| ENPP4              | 2948.44379      | 0.057070762           | 0.072986695  | 0.781933769  |
| SEMA3F             | 3193.707249     | 0.027074888           | 0.075561675  | 0.358315083  |
| CFTR               | 541.9143115     | 1.515282757           | 0.170793854  | 8.871998125  |
| ANKIB1             | 2391.736499     | 0.033639022           | 0.056940437  | 0.590775611  |
| CYP51A1            | 295.0651608     | 0.24878242            | 0.085728809  | 2.901969846  |
| KRIT1              | 1375.760332     | 0.065209529           | 0.046446094  | 1.403983037  |
| RAD52              | 417.4174643     | 0.056241382           | 0.046402992  | 1.212020589  |
| MYH16              | 9.410934193     | -0.116432262          | 0.104942332  | -1.109488041 |
| BAD                | 3158.042685     | -0.657152825          | 0.057650582  | -11.39889319 |
| LAP3               | 3759.945621     | 0.022381252           | 0.041457547  | 0.539859539  |
| CD99               | 14964.81967     | -0.265242577          | 0.045118706  | -5.878771842 |
| HS3ST1             | 680.3570199     | -0.879142739          | 0.129775257  | -6.774347882 |
| AOC1               | 1146.5622       | 0.955086427           | 0.241731734  | 3.951017973  |
| WNT16              | 26.05574606     | 0.425750578           | 0.145079069  | 2.934610631  |
| HECW1              | 154.1697012     | 0.734975705           | 0.160949649  | 4.566494606  |
| MAD1L1             | 2077.475732     | -0.499943897          | 0.062411308  | -8.01046977  |
| LASP1              | 5503.594615     | 0.056362526           | 0.055906535  | 1.008156318  |
| SNX11              | 1211.622952     | -0.217109667          | 0.034224346  | -6.34372005  |
| TMEM176A           | 458.0002048     | -0.078610728          | 0.101428046  | -0.775039363 |
| M6PR               | 2385.092864     | 0.450005195           | 0.057087433  | 7.882736524  |
| KLHL13             | 353.8729862     | 0.559824092           | 0.079211395  | 7.067469153  |
| CYP26B1            | 148.3780356     | 0.061491643           | 0.130368838  | 0.471674395  |
| ICA1               | 4082.619233     | -0.151831392          | 0.046080824  | -3.294893163 |
| DBNDD1             | 1927.820466     | -0.442446542          | 0.075431888  | -5.865510666 |
| ALS2               | 1197.771485     | 0.114957599           | 0.038476904  | 2.987703967  |
| CASP10             | 368.2165196     | 0.024048551           | 0.090889977  | 0.264589689  |
| CFLAR              | 5303.532497     | 0.159976592           | 0.031033738  | 5.154925016  |
| TFPI               | 797.2303099     | -0.015059013          | 0.132374595  | -0.1137606   |
| NDUFAF7            | 519.2541328     | -0.143270162          | 0.031625397  | -4.530224905 |
| RBM5               | 5488.766701     | -0.093831351          | 0.043412714  | -2.161379556 |
| MTMR7              | 46.98051652     | 0.01493364            | 0.064621034  | 0.23109565   |
| SLC7A2             | 4314.896378     | 0.097903285           | 0.07383735   | 1.325931714  |
| ARF5               | 8411.887567     | -0.472712385          | 0.048407199  | -9.765332333 |
| SARM1              | 729.1575055     | 0.168878785           | 0.04626034   | 3.650617004  |
| POLDIP2            | 6877.576466     | -0.224661193          | 0.031636175  | -7.101401822 |
| PLXND1             | 2140.092903     | -0.026659616          | 0.073251993  | -0.363943898 |
| AK2                | 5064.643364     | -0.17282562           | 0.028382571  | -6.089146061 |
| CD38               | 2844.721166     | 1.175345845           | 0.182801634  | 6.4296244    |

|            |             |              |             |              |
|------------|-------------|--------------|-------------|--------------|
| FKBP4      | 15642.6712  | -0.339232853 | 0.052597954 | -6.449544605 |
| KDM1A      | 5840.787388 | -0.091532289 | 0.033554616 | -2.727859807 |
| RBM6       | 4486.867527 | -0.318173419 | 0.059775125 | -5.322839904 |
| CAMKK1     | 710.1199549 | -0.442694595 | 0.069651156 | -6.355882918 |
| RECQL      | 585.6686866 | 0.280377426  | 0.07438706  | 3.769169368  |
| CCDC132    | 1181.503719 | -0.029699505 | 0.045300835 | -0.655606137 |
| HSPB6      | 2935.139023 | 0.34631678   | 0.129020122 | 2.684207511  |
| ARHGAP33   | 579.4789161 | -0.417234252 | 0.076452966 | -5.457397867 |
| NDUFAB1    | 2510.129826 | -0.532105546 | 0.047582644 | -11.18276534 |
| PDK4       | 3877.872773 | 0.28889551   | 0.137273626 | 2.104523051  |
| SLC22A16   | 24.66358962 | -0.038389708 | 0.182344292 | -0.21053419  |
| ZMYND10    | 198.6054952 | -0.542690846 | 0.158013139 | -3.434466594 |
| ABCB5      | 15.70967323 | 0.094893611  | 0.152789102 | 0.621075784  |
| ARX        | 297.4206427 | -0.693163183 | 0.174627705 | -3.969376928 |
| SLC25A13   | 1633.193711 | -0.114146787 | 0.050290937 | -2.269728768 |
| ST7        | 1772.117773 | -0.0353732   | 0.045262484 | -0.781512555 |
| CDC27      | 2281.172188 | 0.068970466  | 0.035573856 | 1.938796473  |
| SLC4A1     | 4.266492365 | -0.662997999 | 0.158521447 | -4.182386741 |
| CALCR      | 2.92007471  | 0.024379531  | 0.154164769 | 0.158139448  |
| HCCS       | 874.8906035 | -0.028208108 | 0.029652049 | -0.951303831 |
| DVL2       | 2161.254531 | 0.004439754  | 0.03377524  | 0.131449971  |
| PRSS22     | 776.9200269 | 0.097850982  | 0.085870581 | 1.139516942  |
| UPF1       | 10120.25917 | 0.009012232  | 0.027584039 | 0.326719096  |
| SKAP2      | 1790.706832 | 0.01287367   | 0.058703516 | 0.219299819  |
| SLC25A5    | 10101.54623 | -0.155021331 | 0.049579989 | -3.126691541 |
| CCDC109B   | 229.8413735 | -0.048787805 | 0.078106379 | -0.624632777 |
| HOXA11     | 742.9886209 | -0.346245417 | 0.063416071 | -5.459900202 |
| POLR2J     | 2302.789111 | -0.689531377 | 0.062926369 | -10.95774938 |
| DHX33      | 1273.54706  | 0.045656839  | 0.039779247 | 1.147755209  |
| MEOX1      | 189.5509663 | 0.159277442  | 0.108499839 | 1.467997025  |
| THSD7A     | 1218.195847 | -0.129917682 | 0.149822    | -0.867146895 |
| LIG3       | 3410.327877 | -0.10300211  | 0.05293393  | -1.945861757 |
| RPAP3      | 1378.67514  | -0.040420621 | 0.028860253 | -1.400563636 |
| ACSM3      | 2804.026783 | 0.009747482  | 0.107170434 | 0.090953092  |
| AC004381.6 | 750.6066895 | -0.302180359 | 0.0618405   | -4.886447527 |
| CIAPIN1    | 1905.028368 | -0.139718026 | 0.040628074 | -3.43895274  |
| SPPL2B     | 2829.20372  | -0.380146312 | 0.055218938 | -6.88434669  |
| FAM214B    | 1552.608247 | -0.344118826 | 0.052101005 | -6.604840497 |
| COPZ2      | 641.1585801 | -0.372323031 | 0.094884017 | -3.923980475 |
| PRKAR2B    | 1311.745378 | -0.113175473 | 0.079566852 | -1.422394762 |
| MSL3       | 1242.69121  | -0.24151968  | 0.036235978 | -6.665190133 |
| CREBBP     | 5566.2546   | 0.209668708  | 0.044367935 | 4.725680974  |
| BZRAP1     | 1856.721092 | -0.076295553 | 0.065845271 | -1.158709676 |
| MPO        | 8.872469504 | 0.212099413  | 0.116933475 | 1.813846826  |
| PON1       | 104.1752602 | -0.873430201 | 0.286420269 | -3.049470643 |
| GCFC2      | 1640.991276 | -0.019722515 | 0.045488004 | -0.433576176 |
| WDR54      | 743.8431456 | -0.45212366  | 0.059393317 | -7.612365836 |
| CROT       | 2473.603065 | 0.142849156  | 0.058657692 | 2.435301333  |
| ABCB4      | 51.20108407 | -0.023349716 | 0.082118442 | -0.284341933 |
