# Supplementary material for: Gene Expression Analysis Reveals Prognostic Biomarkers of the Tyrosine Metabolism Reprogramming Pathway for Prostate Cancer
Source: J Oncol. 2022 Jul 6;2022:5504173. doi: 10.1155/2022/5504173 (PMC9279037; doi:10.1155/2022/5504173)
Supplement: Supplementary Materials — Supplemental Table 1: top 100 differentially expressed genes between S1 and S2. Supplemental Table 2: significant hallmark gene set enrichment analysis results between S1 and S2. [file 5504173.f1.zip]

Archive with 3 entries (2 files):
- 5504173.f1/
- 5504173.f1/Supplemental Table 1.pdf
- 5504173.f1/supplemental Table 2.pdf
